# Supplementary material
Source: MDPI journal article supplement (https://www.mdpi.com/2076-3263/13/9/266)

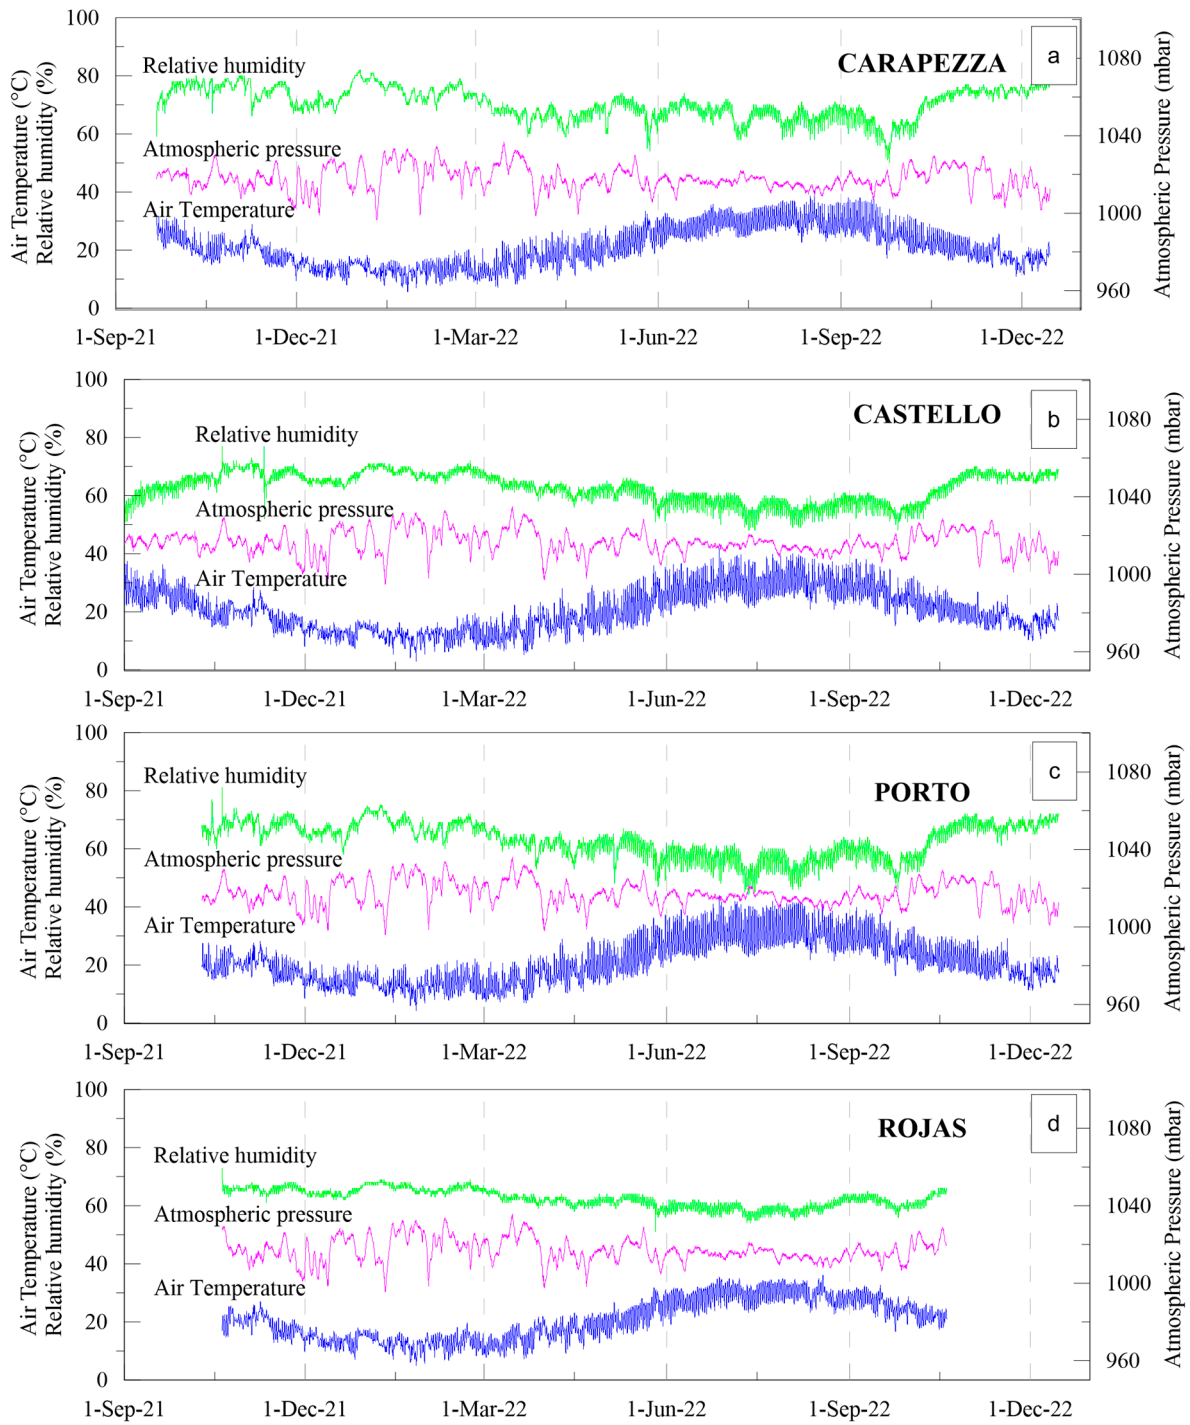

**Figure S1.** Environmental variables.

Supplement: s1 [file s1]
